# Supplementary material for: Homonuclear multi-atom catalysts for CO2 electroreduction: a comparison density functional theory study with their single-atom counterparts
Source: Royal Society of Chemistry journal article supplement (doi:10.1039/d3ta05498e), 2023-01-01
Supplement: d3ta05498e1.pdf [file d3ta05498e1.pdf]

## Supplementary Material

### **Homonuclear Multi-Atom Catalysts for CO<sub>2</sub> Electroreduction: A Comparison**

### **Density Functional Theory Study with Single-Atom Counterparts**

Jingjing Xiao,<sup>a</sup> Ziyang Liu,<sup>a</sup> Xinshuang Wang,<sup>a</sup> Fengyu Li,<sup>a,\*</sup> and Zhonglong Zhao<sup>a,\*</sup>

*<sup>a</sup> School of Physical Science and Technology, Inner Mongolia University, Hohhot  
010021, China*

\* Corresponding Authors: fengyuli@imu.edu.cn(FL); zlzhao@imu.edu.cn (ZZ)

**Table S1.** Formation energies of homonuclear trimetallic atomic metals adsorbed on the surface oxygen sites of  $\text{Mo}_2\text{CO}_2$  or embedded in the oxygen vacancies.

| <b>Structure</b> | <b><math>E_f</math> (eV)<br/>embedment</b> | <b><math>F_f</math> (eV)<br/>adsorption</b> |
|------------------|--------------------------------------------|---------------------------------------------|
| Ti               | -2.70                                      | ---                                         |
| V                | -1.89                                      | ---                                         |
| Cr               | -1.63                                      | ---                                         |
| Mn               | -2.38                                      | -2.05                                       |
| Fe               | -2.04                                      | -1.03                                       |
| Co               | -1.97                                      | -0.72                                       |
| Ni               | -2.21                                      | -0.76                                       |
| Cu               | -2.45                                      | -1.28                                       |
| Zn               | -3.13                                      | -2.46                                       |
| Zr               | -2.90                                      | ---                                         |
| Nb               | -1.96                                      | -0.68                                       |
| Mo               | -1.50                                      | -0.35                                       |
| Ru               | -1.71                                      | 0.50                                        |
| Rh               | -2.31                                      | -0.16                                       |
| Pd               | -2.40                                      | -0.48                                       |
| Ag               | -2.85                                      | -2.03                                       |
| Hf               | -2.65                                      | ---                                         |
| Ta               | -1.69                                      | -1.23                                       |
| W                | -0.90                                      | 0.48                                        |
| Re               | -1.13                                      | 0.71                                        |
| Os               | -1.22                                      | 1.16                                        |
| Ir               | -1.94                                      | 0.79                                        |
| Pt               | -2.65                                      | -0.44                                       |
| Au               | -2.97                                      | -1.67                                       |

**Table S2.** Formation energies of homonuclear bimetallic atomic metals adsorbed on the surface oxygen sites of Mo<sub>2</sub>CO<sub>2</sub> or embedded in the oxygen vacancies.

| <b>Structure</b> | <b>E<sub>f</sub> (eV)<br/>emdedment</b> | <b>E<sub>f</sub> (eV)<br/>adsorption</b> |
|------------------|-----------------------------------------|------------------------------------------|
| Ti               | -2.53                                   | ---                                      |
| V                | -1.84                                   | ---                                      |
| Cr               | -1.52                                   | ---                                      |
| Mn               | -0.62                                   | ---                                      |
| Fe               | -1.64                                   | -1.43                                    |
| Co               | -1.88                                   | -0.67                                    |
| Ni               | -2.08                                   | -0.75                                    |
| Cu               | -2.46                                   | -1.26                                    |
| Zn               | -3.13                                   | -2.70                                    |
| Zr               | -2.66                                   | ---                                      |
| Nb               | -1.87                                   | ---                                      |
| Mo               | -1.41                                   | -0.58                                    |
| Ru               | -1.60                                   | 0.58                                     |
| Rh               | -2.13                                   | 0.29                                     |
| Pd               | -2.30                                   | -0.48                                    |
| Ag               | -2.91                                   | -1.97                                    |
| Hf               | -2.35                                   | ---                                      |
| Ta               | -1.54                                   | ---                                      |
| W                | -0.85                                   | 0.73                                     |
| Re               | -1.03                                   | 1.67                                     |
| Os               | -1.09                                   | 1.81                                     |
| Ir               | -1.78                                   | 1.36                                     |
| Pt               | -2.56                                   | 0.27                                     |
| Au               | -3.02                                   | -1.07                                    |

**Table S3.** Formation energies of homonuclear monometallic atomic metals adsorbed on the surface oxygen sites of Mo<sub>2</sub>CO<sub>2</sub> or embedded in the oxygen vacancies.

| <b>Structure</b> | <b>E<sub>f</sub> (eV)<br/>embedment</b> | <b>E<sub>f</sub> (eV)<br/>adsorption</b> |
|------------------|-----------------------------------------|------------------------------------------|
| Ti               | -1.87                                   | ---                                      |
| V                | -0.92                                   | ---                                      |
| Cr               | -1.49                                   | ---                                      |
| Mn               | -1.94                                   | 2.68                                     |
| Fe               | -0.59                                   | 0.06                                     |
| Co               | -1.32                                   | -1.06                                    |
| Ni               | -1.87                                   | -0.57                                    |
| Cu               | -2.30                                   | -1.50                                    |
| Zn               | -2.62                                   | -2.60                                    |
| Zr               | -3.80                                   | 1.48                                     |
| Nb               | -0.85                                   | ---                                      |
| Mo               | 0.10                                    | 0.14                                     |
| Ru               | -0.53                                   | 1.16                                     |
| Rh               | -1.58                                   | 0.02                                     |
| Pd               | -2.29                                   | -0.43                                    |
| Ag               | -2.83                                   | -2.21                                    |
| Hf               | -1.53                                   | ---                                      |
| Ta               | -0.27                                   | ---                                      |
| W                | 0.81                                    | 1.38                                     |
| Re               | 0.71                                    | 1.62                                     |
| Os               | 0.40                                    | 1.71                                     |
| Ir               | -0.86                                   | 2.66                                     |
| Pt               | -2.31                                   | 1.14                                     |
| Au               | -2.91                                   | -0.83                                    |

**Table S4.** Reaction free energies for CO<sub>2</sub>RR on the Ir TAC calculated by approximate solvation correction and explicit water bilayer solvation model, respectively.

| Ir TAC                              | $\Delta G(\text{approximate solvation})$ | $\Delta G(\text{explicit solvation})$ |
|-------------------------------------|------------------------------------------|---------------------------------------|
| CO <sub>2</sub> → *HCOO             | -0.46                                    | -0.23                                 |
| *HCOO → *HCOOH                      | 0.21                                     | 0.36                                  |
| *HCOOH → *CHO                       | 0.22                                     | 0.42                                  |
| *CHO → *CHOH                        | 0.01                                     | 0.14                                  |
| *CHOH → *CH                         | -0.51                                    | -0.69                                 |
| *CH → *CH <sub>2</sub>              | -0.23                                    | -0.23                                 |
| *CH <sub>2</sub> → *CH <sub>3</sub> | -0.08                                    | -0.07                                 |
| *CH <sub>3</sub> → CH <sub>4</sub>  | -0.60                                    | -0.76                                 |

**Table S5.** The fitted energy correction ( $\Delta E$ ) - electric potential (U) quadratic function for each reaction steps of CO<sub>2</sub>RR on the Rh TAC at pH = 0.

| Absorbate                           | Rh TAC                                  |
|-------------------------------------|-----------------------------------------|
| CO <sub>2</sub> → *HCOO             | $\Delta E = 1.00 + 8.87 U - 9.91 U^2$   |
| *HCOO → *HCOOH                      | $\Delta E = 0.87 + 5.45 U - 5.17 U^2$   |
| *HCOOH → *CHO                       | $\Delta E = 0.76 + 9.61 U - 10.00 U^2$  |
| *CHO → *CHOH                        | $\Delta E = 0.80 + 7.16 U - 6.58 U^2$   |
| *CHOH → *CH                         | $\Delta E = 1.17 + 7.92 U - 7.26 U^2$   |
| *CH → *CH <sub>2</sub>              | $\Delta E = 0.78 + 10.47 U - 12.56 U^2$ |
| *CH <sub>2</sub> → *CH <sub>3</sub> | $\Delta E = 0.77 + 9.79 U - 12.01 U^2$  |

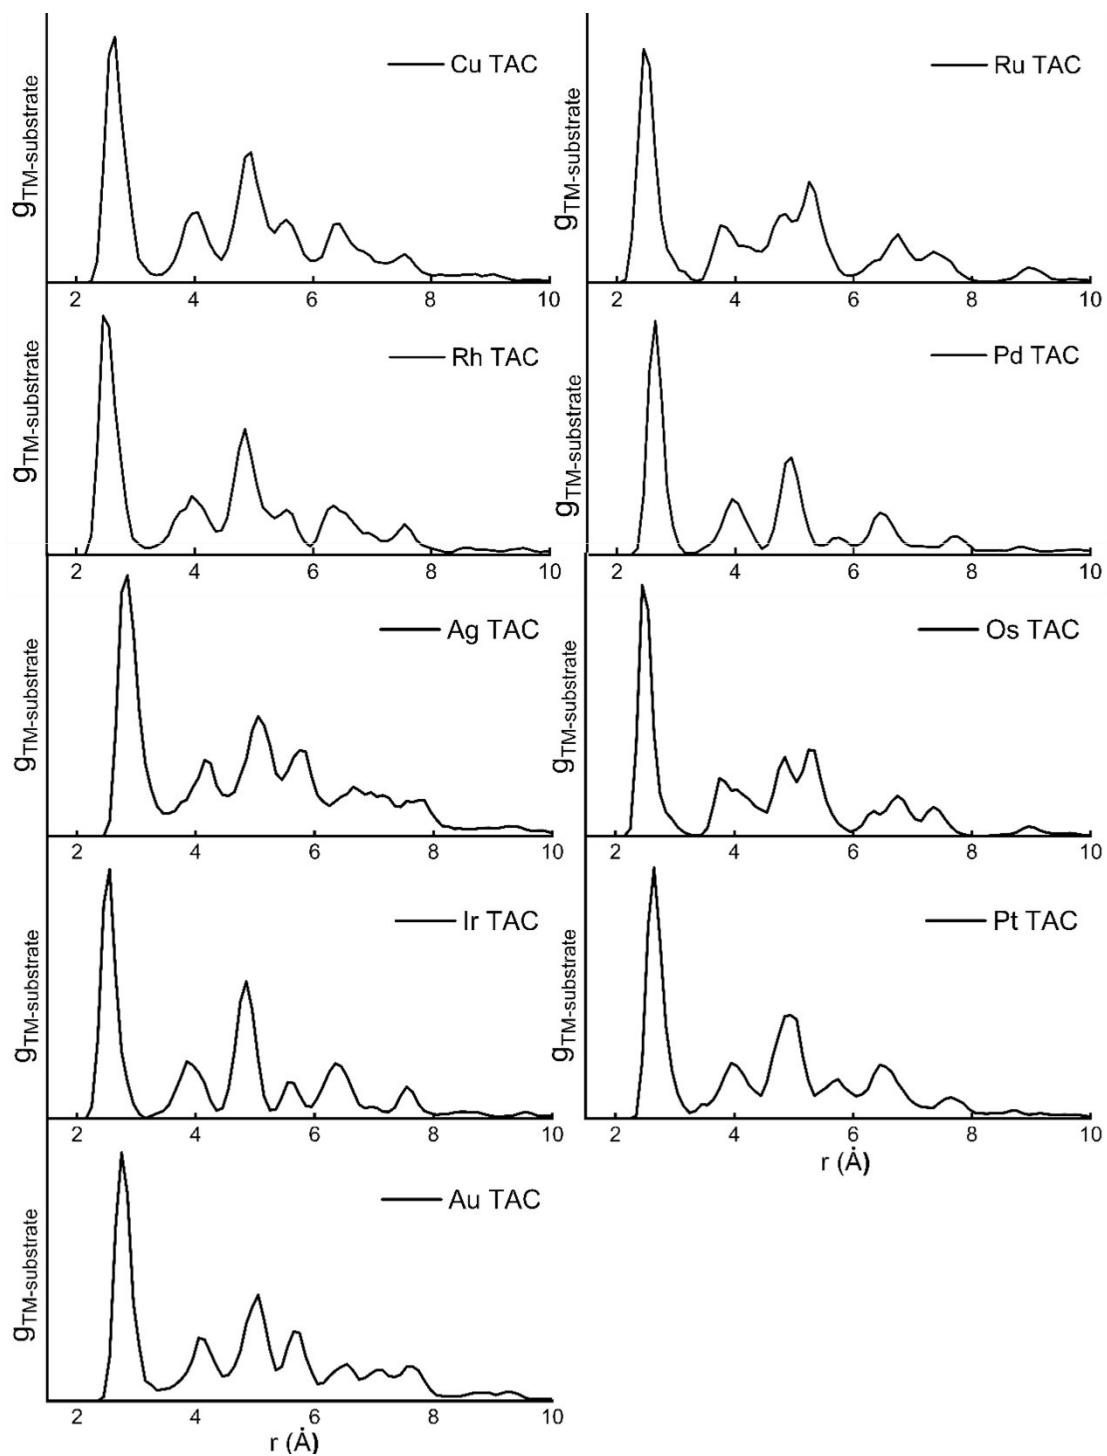

**Fig. S1** Radial distribution function of selected TACs at 500 K after a 10 ps MD simulation.

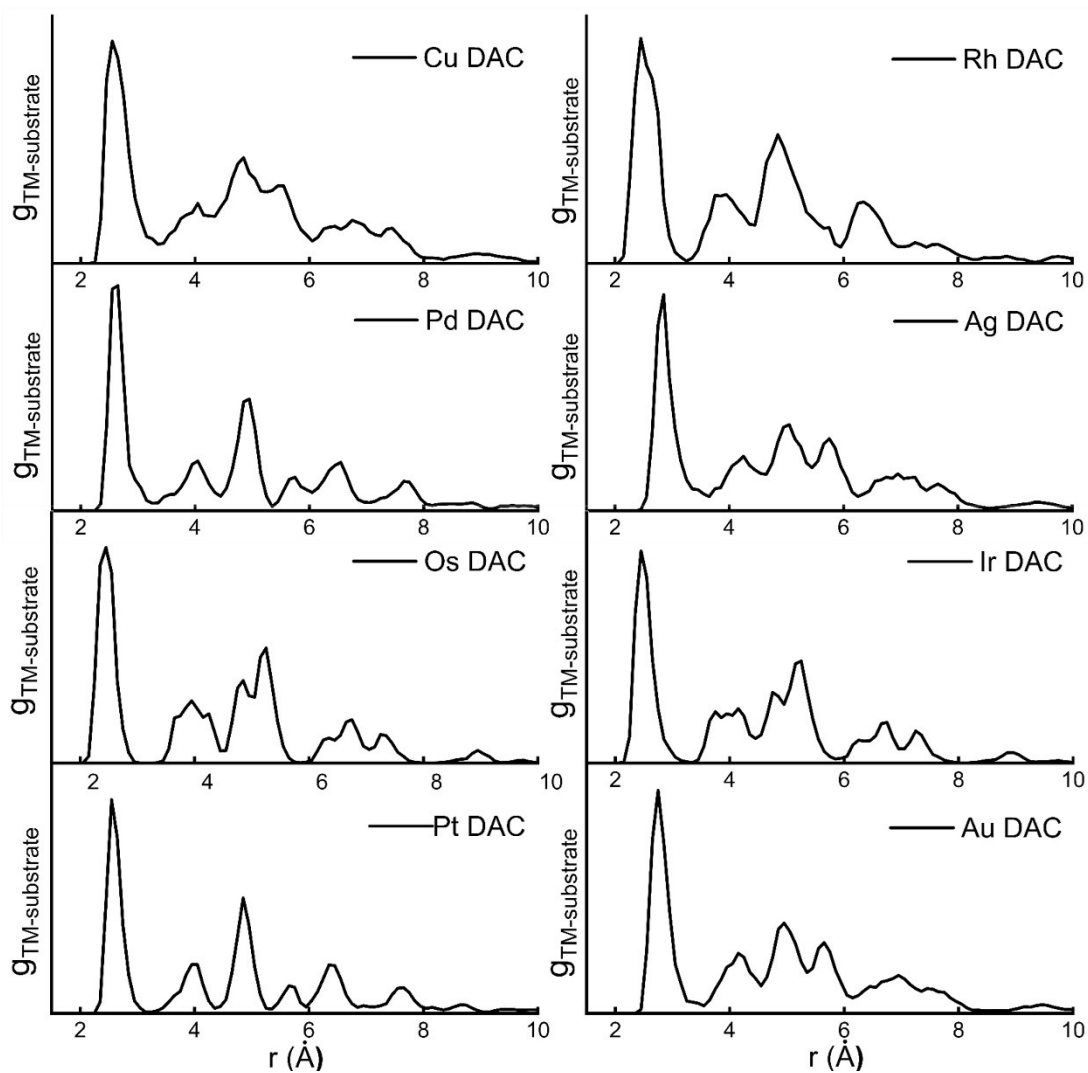

**Fig. S2** Radial distribution function of selected DACs at 500 K after a 10 ps MD simulation.



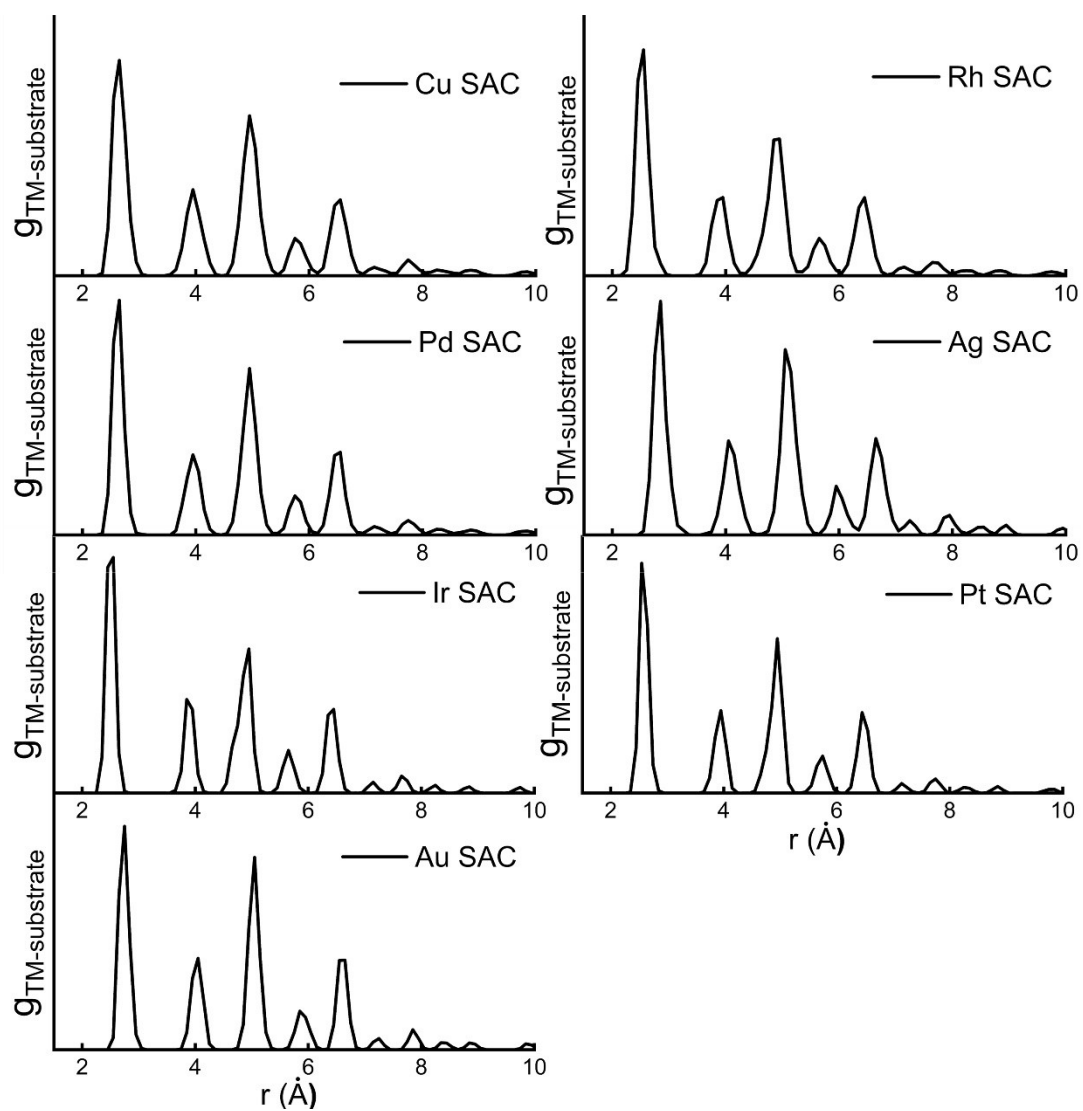

**Fig. S3** Radial distribution function of selected SACs at 500 K after a 10 ps MD simulation.

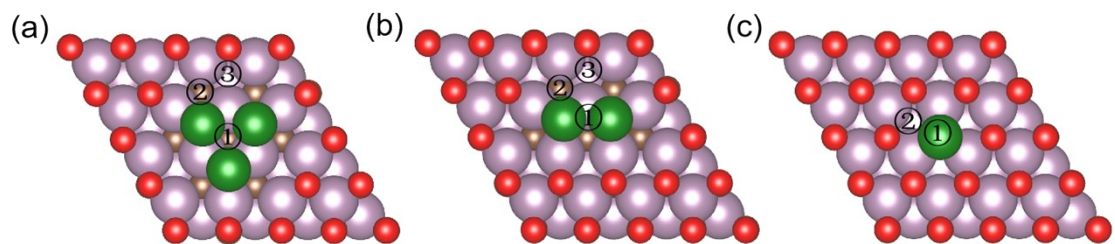

**Fig. S4** The considered adsorption sites on TACs, DACs, and SACs. Green, red, purple, and brown spheres represent TM, O, Mo, and C atoms, respectively.

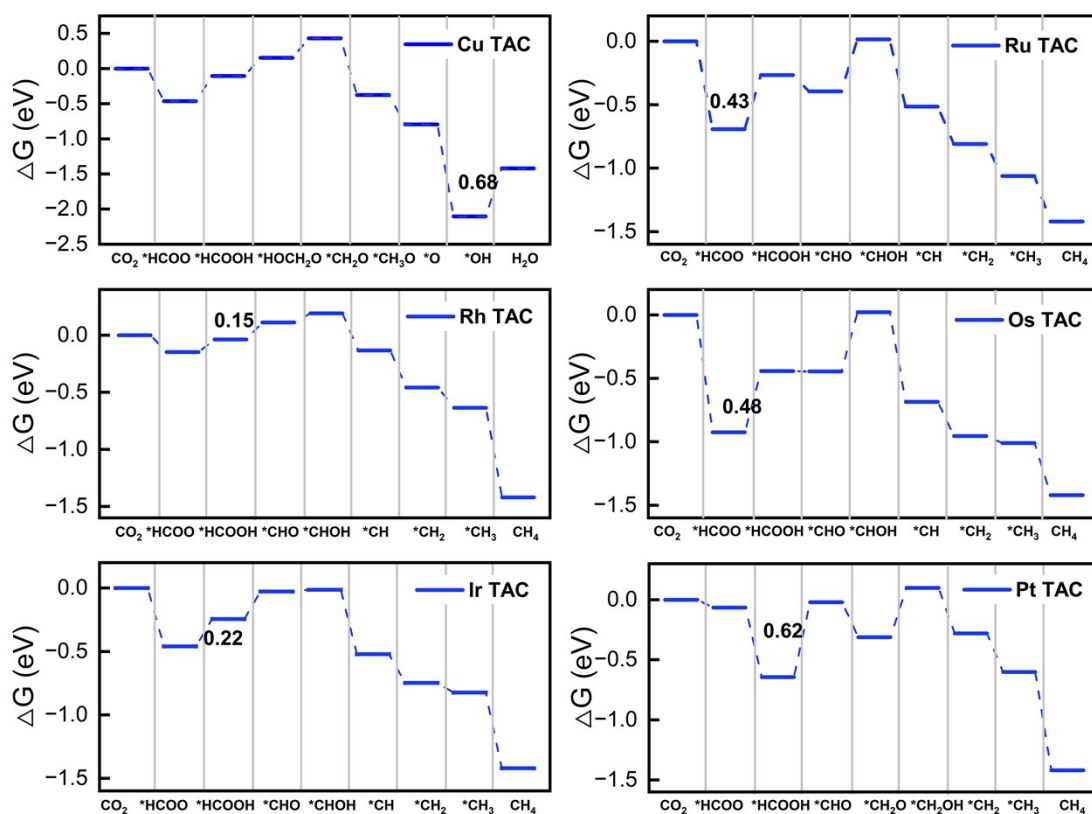

**Fig. S5** Free energy diagram for CO<sub>2</sub>RR on the six TACs (Cu, Ru, Rh, Os, Ir, and Pt).

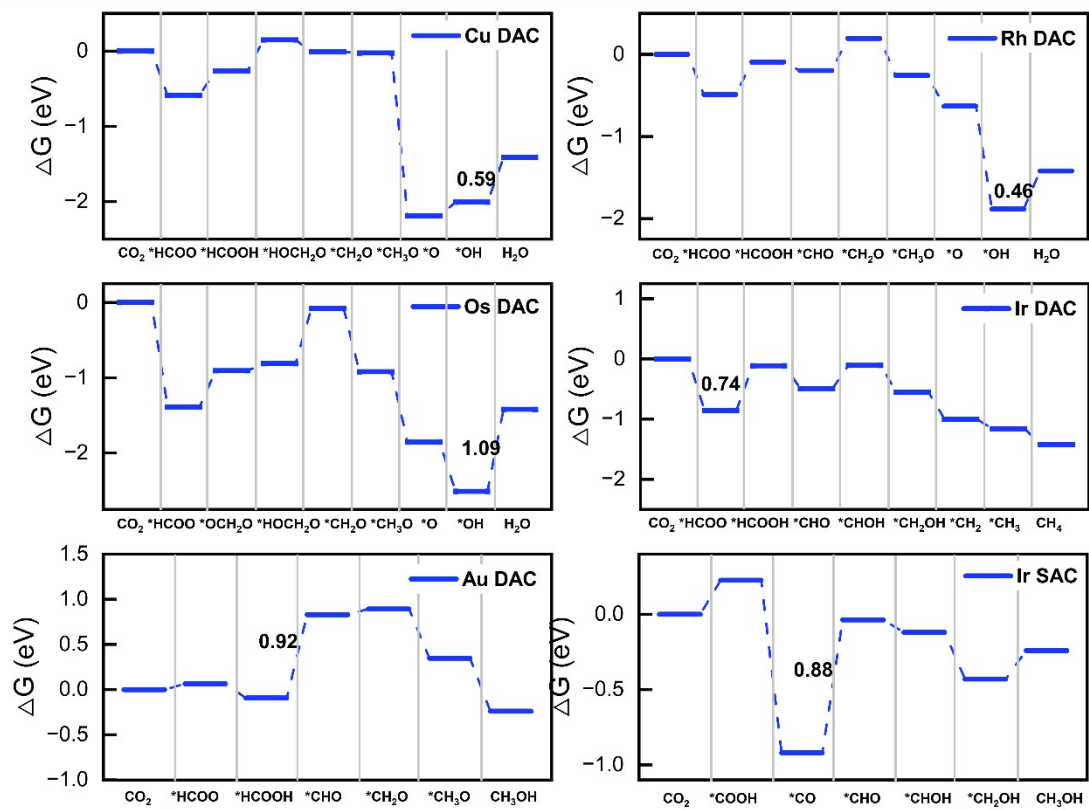

**Fig. S6** Free energy diagram for CO<sub>2</sub>RR on the five DACs (Cu, Rh, Os, Ir, and Au) and one SAC (Ir).

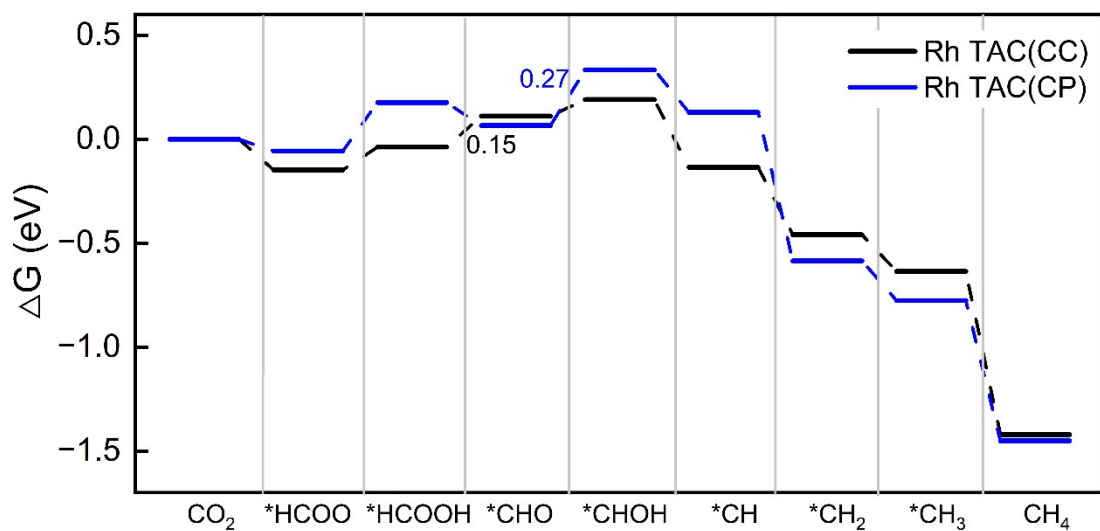

**Fig. S7** Free energy diagrams for  $\text{CH}_4$  production on Rh TAC calculated by constant charge (CC) method at 0 V vs. RHE and constant potential (CP) method at 0 V vs. RHE (pH = 0).

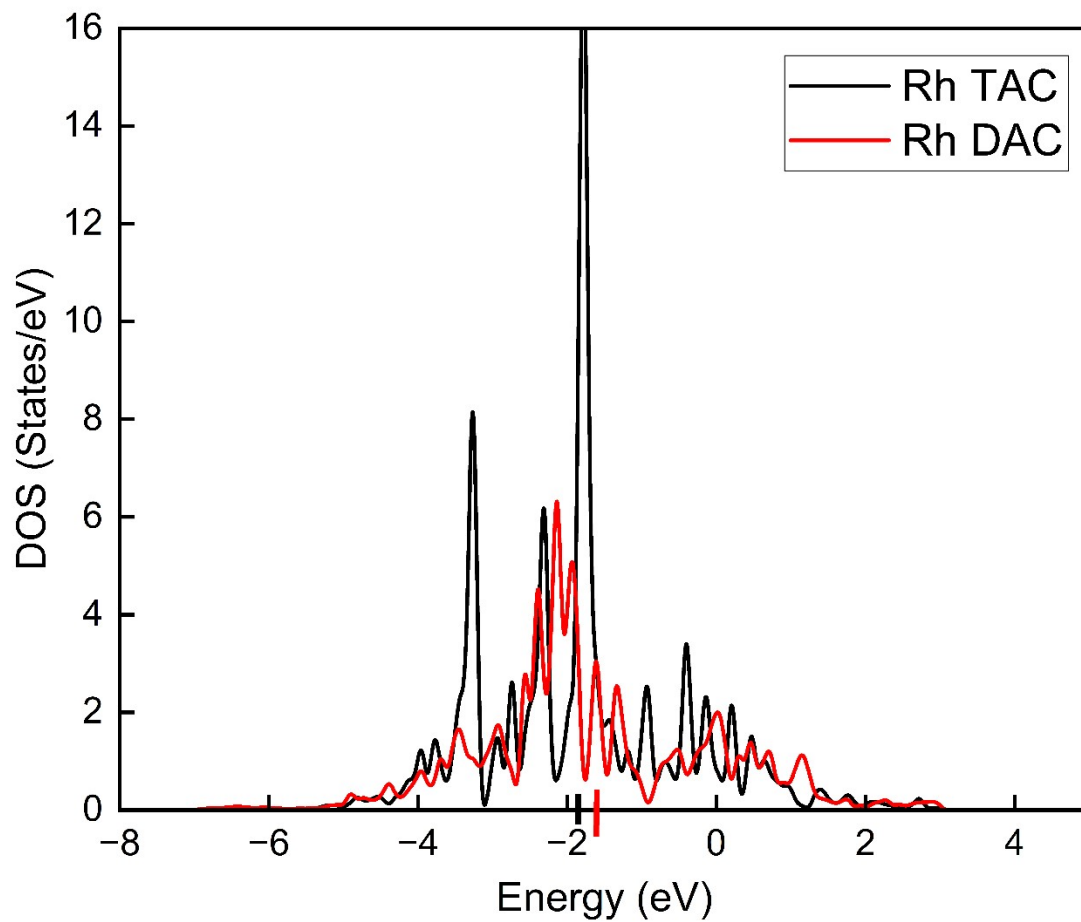

**Fig. S8** Projected density of states (DOS) of the *d*-band for Rh atoms in Rh TAC and DAC. The vertical black and red lines indicate the *d*-band center.

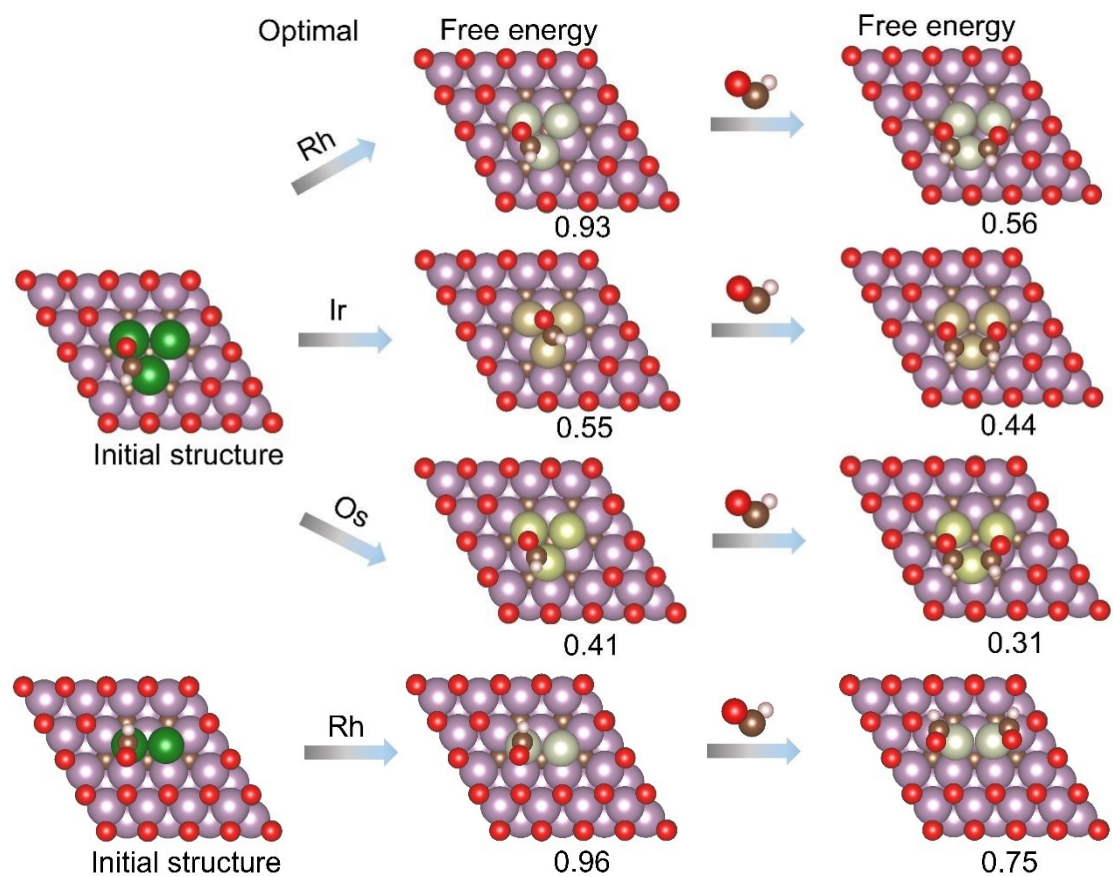

**Fig. S9** Adsorption structure and free energy of single \*CHO and double \*CHO intermediates on Rh, Ir, Os TACs, and Rh DAC.

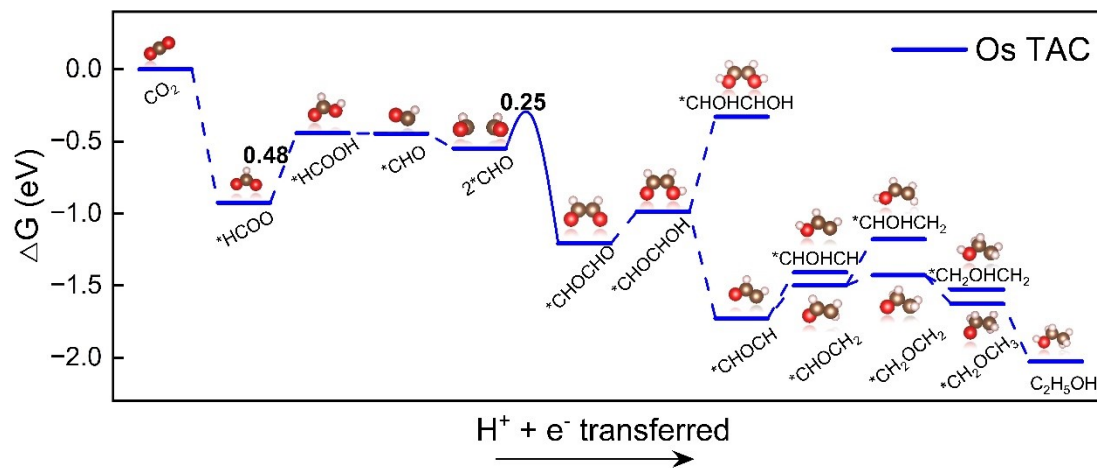

**Fig. S10** Free energy diagram for C<sub>2</sub>H<sub>5</sub>OH production on Os TAC. Atomic structures of the intermediates are shown as insets. Gray, red, and white spheres represent C, O, and H atoms, respectively.



---

## Optimized geometries

### The optimized atomic geometries for Rh TAC, Os TAC, Ir TAC, and Rh DAC

\*Rh TAC (fractional coordinates)

1.0000000000000000

11.9879999160999997 0.0000000000000000 0.0000000000000000

-5.9939999579999999 10.3819124678999994 0.0000000000000000

0.0000000000000000 0.0000000000000000 21.2723007202000005

Rh Mo C O

3 32 16 25

Direct

0.4255286590523153 0.3509295955351053 0.3221783308830800

0.4255395366186391 0.5744577383971029 0.3221784233446556

0.6490724454830983 0.5744695536440697 0.3221722538271382

0.0785729612516317 0.1657342946437750 0.2368436746724069

0.3297029878408200 0.1594034225475959 0.2356413815547027

0.5871413713141099 0.1657334916875442 0.2368396849280509

0.8333232824436179 0.1666774572929842 0.2377321122458490

0.0785729098176146 0.4128368092531328 0.2368435301476064

0.3282486690519399 0.4141654943124324 0.2322276832128647

0.5858722960601320 0.4141136282754556 0.2322124627178528

0.8342564202174841 0.4128477671349078 0.2368412984116881

0.0823542429945667 0.6647110990627411 0.2371922487114777

0.3297244005920043 0.6702737748496226 0.2356177941178583

0.5858319240125133 0.6717603648680419 0.2322263014384475

0.8405979807393941 0.6703007626041569 0.2356389720494526

0.0823508888767546 0.9176515165577159 0.2371957753466089

0.3352918770083793 0.9176461765803696 0.2371927119986773

0.5871644805992120 0.9214308001312832 0.2368455285351828

0.8342679124543209 0.9214321500273627 0.2368446726283714

0.1655074615250234 0.0826437087031107 0.1101167996631062

---

|                    |                    |                    |
|--------------------|--------------------|--------------------|
| 0.4171340987361963 | 0.0826262439621213 | 0.1101135390988556 |
| 0.6670634869847575 | 0.0835368622301845 | 0.1094255318318322 |
| 0.9164633656093693 | 0.0835379674898561 | 0.1094261195757109 |
| 0.1661571885170178 | 0.3330764379605103 | 0.1113783115471522 |
| 0.4153049472118219 | 0.3306137027167522 | 0.1122757263388161 |
| 0.6669205320715610 | 0.3330825302017513 | 0.1113825687689257 |
| 0.9164628429018429 | 0.3329366814048663 | 0.1094249420412874 |
| 0.1654903298292318 | 0.5828574022656222 | 0.1101063043537207 |
| 0.4153111793144146 | 0.5846912275197919 | 0.1122694261193394 |
| 0.6693849416453174 | 0.5846937119476392 | 0.1122756162023321 |
| 0.9173790796983144 | 0.5828671642981723 | 0.1101105591434406 |
| 0.1666675578507817 | 0.8333337469294272 | 0.1084990650425842 |
| 0.4171434547566477 | 0.8345113055272606 | 0.1101072476437224 |
| 0.6669238283714801 | 0.8338446429571198 | 0.1113803957646828 |
| 0.9173699118871742 | 0.8345103435599308 | 0.1101132518693300 |
| 0.9990630630390400 | 0.0009339232837886 | 0.1731278639765830 |
| 0.2477853461158224 | 0.9955665007754718 | 0.1728820197601157 |
| 0.5018693362857313 | 0.0009346633958604 | 0.1731289215300509 |
| 0.7509493450914936 | 0.0019082482305236 | 0.1730739979935584 |
| 0.9980940148413012 | 0.2490551141960579 | 0.1730721378622259 |
| 0.2456927672686601 | 0.2428396565612526 | 0.1748364218307759 |
| 0.4971416771773892 | 0.2428167651493586 | 0.1748326111024171 |
| 0.7509551108182164 | 0.2490438894000747 | 0.1730759213680858 |
| 0.9990685613200945 | 0.4981332956028007 | 0.1731272745900992 |
| 0.2456692606099243 | 0.5028469753691249 | 0.1748326869580173 |
| 0.4999968459710533 | 0.5000081584468236 | 0.1747059056678676 |
| 0.7571810582574804 | 0.5028547086772448 | 0.1748319312681071 |
| 0.0044363567483226 | 0.7522159676918089 | 0.1728828121050313 |
| 0.2477859208691928 | 0.7522148892439036 | 0.1728796766411510 |
| 0.4971507047308546 | 0.7543329695475650 | 0.1748323986550228 |

---

|                    |                    |                    |
|--------------------|--------------------|--------------------|
| 0.7571534160306863 | 0.7543056275311260 | 0.1748394683122222 |
| 0.9981544719535942 | 0.0018459284791244 | 0.2929907655952384 |
| 0.2511495460871632 | 0.0023607275269927 | 0.2930269817691545 |
| 0.5036770843874904 | 0.0018354645320243 | 0.2929982206439920 |
| 0.7486108646112680 | 0.9971521395310547 | 0.2932788991948949 |
| 0.0028492841414589 | 0.2513898181512461 | 0.2932780428204974 |
| 0.7485208259759463 | 0.2514850584065757 | 0.2932886589647228 |
| 0.9981692605866372 | 0.4963242964051578 | 0.2929966458658604 |
| 0.9976392536175992 | 0.7488494273363252 | 0.2930252382860998 |
| 0.2512111490372274 | 0.7487895373852694 | 0.2930327396303921 |
| 0.9994719204713249 | 0.0005246068498810 | 0.0536774811400949 |
| 0.2509649559723112 | 0.0019353083086823 | 0.0537353824211307 |
| 0.5010498683607574 | 0.0005260389800197 | 0.0536811667470616 |
| 0.7494962681095032 | 0.9989827403250826 | 0.0539756027951383 |
| 0.0010182125601652 | 0.2505049228392253 | 0.0539745511696697 |
| 0.2509292911690402 | 0.2516940390602387 | 0.0551979166911670 |
| 0.5007602099144577 | 0.2516996694205592 | 0.0551984447179566 |
| 0.7494809841530929 | 0.2505178976787835 | 0.0539772015535429 |
| 0.9994755482021291 | 0.4989519855683234 | 0.0536801041000812 |
| 0.2509458593595467 | 0.4992334125081204 | 0.0551932554167167 |
| 0.5000041242143703 | 0.4999986790330524 | 0.0572020920598374 |
| 0.7482999403057228 | 0.4992410821664736 | 0.0551973495721968 |
| 0.9980708386352474 | 0.7490430109525357 | 0.0537305747006322 |
| 0.2509732339033610 | 0.7490257553716748 | 0.0537289880216311 |
| 0.5007684249173150 | 0.7490557939360655 | 0.0551934091415234 |
| 0.7483063158385221 | 0.7490716580652179 | 0.0551980035826027 |

\*Os TAC (fractional coordinates)

1.0000000000000000

11.9879999160999997

0.0000000000000000

0.0000000000000000

---

|                     |                     |                     |
|---------------------|---------------------|---------------------|
| -5.9939999579999999 | 10.3819124678999994 | 0.0000000000000000  |
| 0.0000000000000000  | 0.0000000000000000  | 21.2723007202000005 |

|    |    |    |    |
|----|----|----|----|
| Os | Mo | C  | O  |
| 3  | 32 | 16 | 25 |

Direct

|                    |                    |                    |
|--------------------|--------------------|--------------------|
| 0.4281308303461768 | 0.3562221064018363 | 0.3201935427818758 |
| 0.4281602437210444 | 0.5718339172612525 | 0.3202229480593329 |
| 0.6437619280606299 | 0.5718553737798391 | 0.3201999056229961 |
| 0.0779468290746232 | 0.1653429283069325 | 0.2369663717132305 |
| 0.3301448514668792 | 0.1603142052087900 | 0.2371435753596175 |
| 0.5873842956656979 | 0.1653424468993050 | 0.2369641765228109 |
| 0.8333315966000406 | 0.1666701029571304 | 0.2377478185985419 |
| 0.0779460288751447 | 0.4125930672817660 | 0.2369732795228975 |
| 0.3303257255081993 | 0.4151936630380170 | 0.2330278085347652 |
| 0.5848356226864400 | 0.4151685366876294 | 0.2330181747045273 |
| 0.8346580641445827 | 0.4126112845042886 | 0.2369635189940799 |
| 0.0824107641822517 | 0.6648038388629360 | 0.2370700134693898 |
| 0.3301816585038845 | 0.6698237458582627 | 0.2371399836265158 |
| 0.5848094917485568 | 0.6696651904646370 | 0.2330319101763481 |
| 0.8396724251715536 | 0.6698434249138319 | 0.2371396675668297 |
| 0.0823960324721953 | 0.9175965822545542 | 0.2370591190273720 |
| 0.3351964082478607 | 0.9175913531502081 | 0.2370672682632926 |
| 0.5874122571539444 | 0.9220588594776622 | 0.2369726609023537 |
| 0.8346566490660863 | 0.9220559842970901 | 0.2369670572420147 |
| 0.1653615362669043 | 0.0822179588239817 | 0.1101413656188717 |
| 0.4168528689702686 | 0.0822182440203034 | 0.1101364357345200 |
| 0.6675800996083681 | 0.0837889766697119 | 0.1096721619134262 |
| 0.9162008213504657 | 0.0838044131898227 | 0.1096824343380746 |
| 0.1661898830380417 | 0.3330986224542710 | 0.1118260801255843 |
| 0.4150682317329203 | 0.3301319597359256 | 0.1120662806241680 |

---

|                    |                    |                    |
|--------------------|--------------------|--------------------|
| 0.6669038844565417 | 0.3331020525731526 | 0.1118303470539213 |
| 0.9162183340565018 | 0.3324194782661956 | 0.1096779246664655 |
| 0.1653658894570682 | 0.5831394122512288 | 0.1101396771394072 |
| 0.4150699013075696 | 0.5849352653226252 | 0.1120649027577837 |
| 0.6698681444693314 | 0.5849327111881472 | 0.1120645186725836 |
| 0.9177808923454615 | 0.5831465675020533 | 0.1101361417034068 |
| 0.1666676036574956 | 0.8333341813895734 | 0.1075819262346262 |
| 0.4168694167542343 | 0.8346422372272612 | 0.1101417138146317 |
| 0.6669082713130130 | 0.8338151916730306 | 0.1118250493123508 |
| 0.9177757508770285 | 0.8346429201976271 | 0.1101411454810960 |
| 0.9989568440318791 | 0.0010434924920381 | 0.1732419809790292 |
| 0.2470172022826635 | 0.9940191406405009 | 0.1723427372811455 |
| 0.5020865508976640 | 0.0010349357232146 | 0.1732448832485343 |
| 0.7509557293831939 | 0.0019248677677485 | 0.1731517739245257 |
| 0.9980815708658995 | 0.2490491378550496 | 0.1731550879751184 |
| 0.2451139089010117 | 0.2410885440943793 | 0.1745325379161677 |
| 0.4959576127846594 | 0.2410536588087537 | 0.1745281048611915 |
| 0.7509628057330000 | 0.2490426190067355 | 0.1731565771889468 |
| 0.9989702582929639 | 0.4979201128839210 | 0.1732453168578936 |
| 0.2450978994450430 | 0.5040345905533614 | 0.1745289753775018 |
| 0.5000023300761591 | 0.4999941445394161 | 0.1735974530503089 |
| 0.7589461280490146 | 0.5040431541564762 | 0.1745266482776640 |
| 0.0059819033047957 | 0.7529841763258311 | 0.1723440620283443 |
| 0.2470179016824524 | 0.7529854278227079 | 0.1723496262632355 |
| 0.4959729308487394 | 0.7549045988044619 | 0.1745300953036530 |
| 0.7589105636952560 | 0.7548862322043193 | 0.1745315344367413 |
| 0.9987754597978900 | 0.0012238908657553 | 0.2930734086880186 |
| 0.2502025438770383 | 0.0004581452926283 | 0.2930844983035692 |
| 0.5024428892053274 | 0.0012187765064637 | 0.2930751451196792 |
| 0.7490140638708797 | 0.9979732878980963 | 0.2933089493067705 |

|                    |                    |                    |
|--------------------|--------------------|--------------------|
| 0.0020274468852499 | 0.2509817711063999 | 0.2933109608613523 |
| 0.7489526441115703 | 0.2510490210366914 | 0.2933112994260731 |
| 0.9987819222762193 | 0.4975518279247875 | 0.2930767437849935 |
| 0.9995343051619070 | 0.7497887560072460 | 0.2930822830307912 |
| 0.2502570635112748 | 0.7497429648564742 | 0.2930846353164408 |
| 0.9992463927078963 | 0.0007535078822768 | 0.0538626371825311 |
| 0.2513362861171575 | 0.0027045931157821 | 0.0535343035965644 |
| 0.5015053820629063 | 0.0007452093321194 | 0.0538601348379618 |
| 0.7496104836809798 | 0.9991924125616531 | 0.0541062716792699 |
| 0.0008098975875873 | 0.2503992636874218 | 0.0541062268378523 |
| 0.2508017947576191 | 0.2516906746825018 | 0.0553514781467917 |
| 0.5008823346091289 | 0.2516993559606615 | 0.0553466960065425 |
| 0.7495927683284019 | 0.2504176573059665 | 0.0541043402834743 |
| 0.9992576906205645 | 0.4985045032811426 | 0.0538628256015312 |
| 0.2508304874039796 | 0.4991258959071725 | 0.0553482392425706 |
| 0.5000000086433517 | 0.4999979949292606 | 0.0572780894825483 |
| 0.7482994279109034 | 0.4991192764996452 | 0.0553459914421278 |
| 0.9972967627441012 | 0.7486725799488412 | 0.0535341634534002 |
| 0.2513676211313436 | 0.7486416288424993 | 0.0535356254097880 |
| 0.5008791253002228 | 0.7491734335798191 | 0.0553499945643847 |
| 0.7483098000651142 | 0.7491978622189061 | 0.0553507695452388 |

\*Ir TAC (fractional coordinates)

1.0000000000000000

11.9879999160999997 0.0000000000000000 0.0000000000000000

-5.9939999579999999 10.3819124678999994 0.0000000000000000

0.0000000000000000 0.0000000000000000 21.2723007202000005

Ir Mo C O

3 32 16 25

Direct

---

|                    |                    |                    |
|--------------------|--------------------|--------------------|
| 0.4254993862586925 | 0.3508539892508558 | 0.3183615116557165 |
| 0.4255527684072511 | 0.5744222957010098 | 0.3184603150781672 |
| 0.6490792725293484 | 0.5744538348431777 | 0.3183770444347571 |
| 0.0782460617928061 | 0.1654956246096484 | 0.2371956970447710 |
| 0.3289520537839363 | 0.1579431401076307 | 0.2372496437166808 |
| 0.5872220653345877 | 0.1654833764276723 | 0.2371961791003974 |
| 0.8333275161381165 | 0.1666883621060348 | 0.2383785916362298 |
| 0.0782540605040404 | 0.4127645236575239 | 0.2371921010815056 |
| 0.3244328924779122 | 0.4123048112867553 | 0.2308141487535698 |
| 0.5877830197575986 | 0.4122603300315731 | 0.2307411666487689 |
| 0.8345267365126268 | 0.4127872283942265 | 0.2371912408675696 |
| 0.0825380125986669 | 0.6650574644424093 | 0.2374364164684622 |
| 0.3290169908954155 | 0.6709953252106745 | 0.2371920963873279 |
| 0.5876891858217718 | 0.6755227296690388 | 0.2307793834624262 |
| 0.8420492940948661 | 0.6710497600950739 | 0.2372371312667838 |
| 0.0825153920953096 | 0.9174874208143009 | 0.2374436012440935 |
| 0.3349559893083524 | 0.9174705334062710 | 0.2374446255270778 |
| 0.5872400978094515 | 0.9217526913476279 | 0.2371925412707343 |
| 0.8345070828467527 | 0.9217564267755021 | 0.2371931961535812 |
| 0.1654631113998808 | 0.0823068078381582 | 0.1102721065509070 |
| 0.4168327266245090 | 0.0823054515559325 | 0.1102648906877122 |
| 0.6672233959008660 | 0.0836200202890358 | 0.1099068859733149 |
| 0.9163850122223179 | 0.0836191207467671 | 0.1099081541024613 |
| 0.1659358924166044 | 0.3329605992513289 | 0.1114100669990966 |
| 0.4152040240194865 | 0.3304216307340478 | 0.1121290977290340 |
| 0.6670290451646549 | 0.3329706067506096 | 0.1114049508762402 |
| 0.9163867839889474 | 0.3327835557598226 | 0.1099059871074556 |
| 0.1654753675075236 | 0.5831547840880383 | 0.1102481169123059 |
| 0.4152150085218264 | 0.5847857389551880 | 0.1121100072853649 |
| 0.6695730709531292 | 0.5847945745006915 | 0.1121210072041023 |

---

|                     |                    |                    |
|---------------------|--------------------|--------------------|
| 0.9177007138842042  | 0.5831709876630802 | 0.1102576932222331 |
| 0.1666752596270868  | 0.8333349655206390 | 0.1081530724830215 |
| 0.4168493389819238  | 0.8345298332017889 | 0.1102510170816327 |
| 0.6670379987287743  | 0.8340624794222824 | 0.1114044037448540 |
| 0.9176885687583257  | 0.8345314782733615 | 0.1102691847792964 |
| 0.9990702166611068  | 0.0009281947963295 | 0.1734406153115041 |
| 0.2472273517448488  | 0.9944504283259213 | 0.1728706140604287 |
| 0.5018422520317314  | 0.0009189621070166 | 0.1734396270426503 |
| 0.7511503339996785  | 0.0023181421321912 | 0.1734044944077606 |
| 0.9976800766812191  | 0.2488499625240677 | 0.1734058773033106 |
| 0.2449259005724988  | 0.2411082470716288 | 0.1746357990025530 |
| 0.4961520411280365  | 0.2410676968262903 | 0.1746230806058142 |
| 0.7511603746296220  | 0.2488474017532067 | 0.1734035738388345 |
| 0.9990864322678041  | 0.4981661493359179 | 0.1734349846209865 |
| 0.2448909923843338  | 0.5038265809178708 | 0.1746003783261938 |
| 0.4999649432939105  | 0.4999915305183428 | 0.1738565447280283 |
| 0.7589473668097517  | 0.5038563171161955 | 0.1746136861181234 |
| 0.0055497039179017  | 0.7527775097651774 | 0.1728697629364475 |
| 0.2472438298954077  | 0.7527698664834915 | 0.1728679777192400 |
| 0.4961809635264290  | 0.7551034633839672 | 0.1746021674265932 |
| 0.7588882252668051  | 0.7550710627824779 | 0.1746305332407751 |
| 0.9981081654267375  | 0.0018996699544281 | 0.2932972240027769 |
| 0.2499881941027310  | 0.0000180899277279 | 0.2936022966098676 |
| 0.5037555568544794  | 0.0018698908077050 | 0.2932974619441222 |
| 0.7485285820457058  | 0.9970139507768694 | 0.2936891192342795 |
| 0.0030005003221560  | 0.2514812624483887 | 0.2936906837328451 |
| 0.7484625189394204  | 0.2515496835107088 | 0.2936846168347645 |
| 0.9981452688134143  | 0.4962595327477854 | 0.2932935022779878 |
| -0.0000295101566702 | 0.7500119917505814 | 0.2935955626654640 |
| 0.2500756676670030  | 0.7499317723961725 | 0.2935795549455225 |



|                    |                    |                    |
|--------------------|--------------------|--------------------|
| 0.9992943133925277 | 0.0007127362542873 | 0.0539846710168750 |
| 0.2511069789317050 | 0.0022323725532380 | 0.0537270979783275 |
| 0.5014170024563525 | 0.0007145555495532 | 0.0539797340158671 |
| 0.7497277433330908 | 0.9994396146185596 | 0.0543240851273149 |
| 0.0005672687985751 | 0.2502744090167780 | 0.0543261143862610 |
| 0.2506332712278443 | 0.2516353385945846 | 0.0552845700067454 |
| 0.5009962614486576 | 0.2516496879653883 | 0.0552784125982506 |
| 0.7497117813056063 | 0.2502908355502521 | 0.0543218165468192 |
| 0.9992921780446961 | 0.4985812740233450 | 0.0539769299403729 |
| 0.2506462856798752 | 0.4989760396125641 | 0.0552653045131872 |
| 0.5000059531828754 | 0.4999946293634848 | 0.0570388865810343 |
| 0.7483533282528860 | 0.4989985148095561 | 0.0552739550190597 |
| 0.9977811104546782 | 0.7489015493127066 | 0.0537243468194084 |
| 0.2511222294794525 | 0.7488828908358669 | 0.0537181181393507 |
| 0.5010154102751396 | 0.7493488366719038 | 0.0552648267423618 |
| 0.7483597122424267 | 0.7493667813797023 | 0.0552781290942128 |

\*Rh DAC (fractional coordinates)

1.0000000000000000

11.9879999160999997 0.0000000000000000 0.0000000000000000

-5.9939999579999999 10.3819124678999994 0.0000000000000000

0.0000000000000000 0.0000000000000000 21.2723007202000005

Rh Mo C O

2 32 16 27

Direct

0.4165845340057088 0.5593346549584253 0.3187830149104584

0.6428451332952754 0.5593144169288071 0.3187549114588285

0.0832644993114467 0.1684317035072615 0.2364924016655435

0.3323409167660204 0.1647040377369287 0.2364385965224195

0.5851691789983409 0.1684457898194487 0.2364877327844458

---

|                    |                    |                    |
|--------------------|--------------------|--------------------|
| 0.8345864274763849 | 0.1691818116313705 | 0.2369838110580100 |
| 0.0784617517394016 | 0.4141390167109060 | 0.2374153435927828 |
| 0.3261404464367731 | 0.4068546644675609 | 0.2360079776968562 |
| 0.5807035073212645 | 0.4068549380617656 | 0.2359974635900094 |
| 0.8356833092710814 | 0.4141605426468878 | 0.2374200168187661 |
| 0.0830234353684663 | 0.6660299803429955 | 0.2376244130389391 |
| 0.3321576253954129 | 0.6736547914501522 | 0.2354611346001682 |
| 0.5872128934677642 | 0.6744824437114949 | 0.2310613228990656 |
| 0.8416016956743078 | 0.6737307949463529 | 0.2354567080413089 |
| 0.0836864783511095 | 0.9182369221140514 | 0.2364338148142206 |
| 0.3345840210277486 | 0.9182336338619399 | 0.2364574176771366 |
| 0.5881181897721128 | 0.9254465858354793 | 0.2353691494731847 |
| 0.8373720096039724 | 0.9254451118966610 | 0.2353704213537825 |
| 0.1660745684512012 | 0.0826864797685005 | 0.1081493723686128 |
| 0.4165781399464767 | 0.0826628921893466 | 0.1081525002640812 |
| 0.6675004984905588 | 0.0849000851061209 | 0.1087536548773609 |
| 0.9173847729340420 | 0.0849002477141240 | 0.1087586866921794 |
| 0.1665028639256781 | 0.3337419490074789 | 0.1105802868937610 |
| 0.4158151420416935 | 0.3316397809718105 | 0.1104426744808363 |
| 0.6671974526483349 | 0.3337182295660426 | 0.1105831528777500 |
| 0.9170186543104513 | 0.3340540423682428 | 0.1091471193902114 |
| 0.1662680076386610 | 0.5832975841327979 | 0.1113378879542859 |
| 0.4159981729963706 | 0.5842992507418002 | 0.1137297925919534 |
| 0.6682783991026444 | 0.5843141523323938 | 0.1137257471877931 |
| 0.9170218972532027 | 0.5832917580931914 | 0.1113379005294023 |
| 0.1667419403136501 | 0.8334889825045831 | 0.1085343811150883 |
| 0.4170939717877865 | 0.8347389207847917 | 0.1097180627936540 |
| 0.6672607794504678 | 0.8345232596944135 | 0.1110401330614664 |
| 0.9176494522753974 | 0.8347556050809483 | 0.1097165170057619 |
| 0.0014715335237777 | 0.0027818992764880 | 0.1722564594589512 |

---

|                    |                     |                    |
|--------------------|---------------------|--------------------|
| 0.2496481389050712 | -0.0007356227190702 | 0.1727570365187637 |
| 0.5013078164452646 | 0.0027715018993242  | 0.1722696097796623 |
| 0.7522779640672158 | 0.0045770570610225  | 0.1719307584506351 |
| 0.9993825689444890 | 0.2509343576073579  | 0.1726890354478037 |
| 0.2461226218142102 | 0.2429433818118668  | 0.1711341211197359 |
| 0.4968117801243649 | 0.2429201976471876  | 0.1711273090172138 |
| 0.7515344144519981 | 0.2509292546625631  | 0.1726853072154756 |
| 0.9993402078834285 | 0.4986805144912710  | 0.1735322735365178 |
| 0.2478540460806502 | 0.5001745715036089  | 0.1772728935478397 |
| 0.4984301770318569 | 0.4968743193485753  | 0.1768241521631561 |
| 0.7523273657611039 | 0.5001725483289874  | 0.1772738660380560 |
| 0.0049025406491086 | 0.7530389756261838  | 0.1727229966041044 |
| 0.2481676208219699 | 0.7530433945650283  | 0.1727337626115081 |
| 0.4978257033496463 | 0.7562212560250748  | 0.1745875066397755 |
| 0.7583942935457351 | 0.7562294176739512  | 0.1745991342827031 |
| 0.9970986520877326 | 0.9998153056136926  | 0.2922165765606582 |
| 0.2501209703532755 | 0.0002358497487166  | 0.2927157133798143 |
| 0.5027868479913428 | 0.9998096534992594  | 0.2922244712077401 |
| 0.7493999455470863 | 0.9987161993283893  | 0.2919461525230390 |
| 0.0017304630918250 | 0.2526041146558197  | 0.2930861390877997 |
| 0.2491227197417008 | 0.2484199329153877  | 0.2926192559428010 |
| 0.4992369916892880 | 0.2484075225399260  | 0.2926252725200972 |
| 0.7508593093625828 | 0.2526491363899109  | 0.2930858081713293 |
| 0.9992809510148897 | 0.4984767348465836  | 0.2935616366961843 |
| 0.9981378994048965 | 0.7508129230863104  | 0.2929174161048678 |
| 0.2526855489707025 | 0.7507260470535797  | 0.2929262741017133 |
| 0.9984056161035070 | -0.0002338997899258 | 0.0527947093700764 |
| 0.2500060155287608 | 0.0000360632814436  | 0.0525108634100499 |
| 0.5013307906377469 | -0.0002559183625155 | 0.0527927349978053 |
| 0.7497632401005775 | -0.0004517968733044 | 0.0534543230514901 |

---

|                    |                    |                    |
|--------------------|--------------------|--------------------|
| 0.0013961571504312 | 0.2521047423851900 | 0.0533147772849911 |
| 0.2508295838489301 | 0.2526352139877318 | 0.0534601857787722 |
| 0.5017550152629086 | 0.2526076688381907 | 0.0534555033790949 |
| 0.7506863184438496 | 0.2521072937056299 | 0.0533140332625019 |
| 0.0005718821109247 | 0.5011665315047212 | 0.0543269342069807 |
| 0.2520139895184649 | 0.5013568262747711 | 0.0561733626005871 |
| 0.5010762321106856 | 0.5022016390973333 | 0.0577302189402314 |
| 0.7493086654966316 | 0.5013654045387388 | 0.0561772649884567 |
| 0.9977801981903588 | 0.7479466754761329 | 0.0539481469743157 |
| 0.2501880568660203 | 0.7479492646556309 | 0.0539462659088231 |
| 0.5004077145047710 | 0.7480809087505808 | 0.0555357214783284 |
| 0.7477205606210204 | 0.7481176293575929 | 0.0555405655594264 |
